1 Running head: Evaluation of GeneMax Advantage

2

3 **Evaluation of Zoetis GeneMax Advantage genomic predictions in commercial *Bos taurus***

4 **Angus cattle**

5

6 Brian. C. Arisman<sup>a,b,1</sup>, Troy N. Rowan<sup>b,c,2,3</sup>, Jordan M. Thomas<sup>b</sup>, Harly J. Durbin<sup>b,c,4</sup>, William R.  
7 Lamberson<sup>b</sup>, David J. Patterson<sup>b</sup>, Jared E. Decker<sup>b,c,d,\*</sup>

8

9 <sup>a</sup>Agricultural and Medical Biotechnology, University of Kentucky, Lexington, Kentucky, 40506

10 <sup>b</sup>Division of Animal Sciences, University of Missouri, Columbia, Missouri, 65211

11 <sup>c</sup>Genetics Area Program, University of Missouri, Columbia, Missouri, 65211

12 <sup>d</sup>Institute for Data Science and Informatics, University of Missouri, Columbia, Missouri, 65211

13 <sup>1</sup>Department of Animal Science, University of Nebraska-Lincoln, Lincoln, Nebraska 68583

14 <sup>2</sup>Department of Animal Science, University of Tennessee Institute of Agriculture, Knoxville,  
15 TN, USA

16 <sup>3</sup>Department of Large Animal Clinical Sciences, College of Veterinary Medicine, University of  
17 Tennessee, Knoxville, TN, USA

18 <sup>4</sup>Syngenta

19 \*Corresponding author: DeckerJE@missouri.edu

20

21

22 **ABSTRACT:** The GeneMax (GMX) Advantage test, developed by Zoetis, uses approximately  
23 50,000 single nucleotide polymorphisms (SNP) to predict the genomic potential of a commercial  
24 Angus heifer. Genetic predictions are provided for Calving Ease Maternal, Weaning Weight,  
25 Heifer Pregnancy, Milk, Mature Weight, Dry Matter Intake, Carcass Weight, Marbling, Yield,  
26 and three economic selection indices. Test results can inform selection and culling decisions  
27 made by commercial beef cattle producers. To measure the accuracy of the trait predictions, data  
28 from commercial Angus females and their progeny at the University of Missouri Thompson  
29 Research Center were utilized to analyze weaning weight, milk, marbling, fat, ribeye area, and  
30 carcass weight. Progeny phenotypic data were matched to the respective dam, then the cow's  
31 genomic predictions were compared to the calf's age-adjusted phenotypes using correlation and  
32 linear model effect sizes. All tested GeneMax scores of the dam were significantly correlated  
33 with and predicted calf performance. Our predicted effect sizes, except for fat thickness, were  
34 similar to those reported by Zoetis. In conclusion, the GeneMax Advantage test accurately ranks  
35 animals based on their genetic merit and is an effective selection tool in commercial cowherds.

36

37 **Key words:** genomic prediction, validation, *Bos taurus*, growth, carcass

38

39 **Abbreviations:**

40 GMX, GeneMax

41 SNP, single nucleotide polymorphisms

42 BIR, Beef Improvement Records

43 WW, Weaning Weight

44 MBV, molecular breeding value

45 BLUP, best linear unbiased prediction

- 46 CW, carcass weight
- 47 Marb, marbling
- 48 RE, ribeye area
- 49 Fat, fat thickness

50

## INTRODUCTION

51

52 Prediction of quantitative traits using DNA markers in beef cattle was first commercialized in the  
53 1990s. However, many of these tests relied on a small number of markers and failed validation  
54 trials (Van Eenennaam et al., 2007). Genomic prediction, the use of thousands of genome-wide  
55 DNA markers (Nejati-Javaremi et al., 1997; Meuwissen et al., 2001), has proven to be a much  
56 more efficacious strategy in driving genetic improvement (García-Ruiz et al., 2016; Taylor et al.,  
57 2016). Still, many farmers, ranchers (Weaber et al., 2014), extension professionals, and even  
58 academics question the effectiveness of genomic prediction in commercial beef cattle.  
59 Demonstrations of the ability of genomic tests to accurately predict genetic merit may encourage  
60 farmers and ranchers to adopt this technology and accelerate genetic progress in commercial  
61 herds. Our objective is to evaluate the effectiveness of the Zoetis GeneMax Advantage (genomic  
62 predictions designed for commercial heifers) in predicting the genetic merit of Angus cattle. We  
63 hypothesize that, because this test was built using principles of genomic prediction, the dam's  
64 GeneMax scores will significantly predict her calves' performance.

65

66

## MATERIALS AND METHODS

67 An Animal Care and Use Committee protocol is not necessary for this project as DNA samples  
68 were collected as part of routine animal production practices. However, the University of  
69 Missouri has a demonstration ACUC protocol, number 7491, which covers the procedures used  
70 in this research.

71 Cows were commercial Angus that were from a crossbred base that were straightbred Angus

72 since 1995. Phenotypic and pedigree data were collected for commercial animals at the

73 University of Missouri's Thompson Research Center and entered into Angus Genetics Inc. Beef  
74 Improvement Records (BIR) program through AngusOnline.org. Pedigree, phenotype, and  
75 GeneMax Advantage score information were retrieved as Excel files from AngusOnline.org in  
76 June of 2018. Phenotypic records were collected from 1995 to 2018, however only calves born  
77 from 2003 to 2011 and from 2014 to 2018 had data reported to BIR and genotyped dams (**Figure**  
78 **1**). Summary statistics are presented in **Table 1**. Excel files were read into R (Team, 2018) and  
79 similar files from different years were combined. Packages utilized included readr (Wickham et  
80 al., 2018b), ggplot2 (Wickham, 2016), tidyr (Wickham and Henry, 2018), dplyr (Wickham et al.,  
81 2018a), and stringr (Wickham, 2018).

82

83 For statistical analyses, the calf phenotype was compared with the dam's GeneMax score (1 to  
84 100 scale). For each of the traits, Pearson and Spearman correlations were calculated.

85

86 To adjust for additional factors, mixed models were used to evaluate the relationship between  
87 calf phenotype and dam's GeneMax Score. We used the model:

$$y = X\beta + Zu + e$$

88 where,  $y$  is the phenotype of the calf;  $\beta$  are fixed effects of contemporary group, sex, and dam  
89 GMX Score;  $u$  is the random effect of sire, and  $e$  is the residual. Both  $u$  and  $e$  are  $\sim N(0, I)$ . For  
90 growth traits, the birth year of the calf was considered the contemporary group. For carcass traits,  
91 contemporary group was defined by the harvest date. There were 47 bulls who sired calves with  
92 weaning weight records, 37 bulls who sired calves with hot carcass weight, marbling, and ribeye  
93 area records, and 23 bulls who sired calves with fat thickness records. For each of the traits, four  
94 models were compared: a full model including dam GMX Score and the random effect of sire, a

95 reduced model that did not include the effect of sire, a reduced model that did not include the  
96 effect of dam GMX Score, and a model with effect of sire and maternal grandsire (MGS). For  
97 each trait, a  $\chi^2$  test was also run between the first and third models to determine the significance  
98 of the inclusion of the cow's GeneMax Advantage score. A  $\chi^2$  test was run between the third  
99 and fourth models to determine if the inclusion of the random effect of maternal grandsire was  
100 significant. Pseudo- $R^2$  values were calculated using the 'r.squaredLR' function from the MuMIn  
101 package (Bartoń, 2022). Calf birth weights were not analyzed because GeneMax does not report  
102 a birth weight score or a calving ease direct score (only calving ease maternal). For weaning  
103 weight, phenotypes were pre-adjusted to 205-day weights and adjusted for age-of-dam effects by  
104 Angus Genetics Inc. Further, a model was also executed that included both Weaning Weight  
105 (WW) GMX Score and Milk GMX Score. Models containing 1) WW GMX Score, 2) Milk  
106 GMX Score, and 3) WW and Milk GMX Scores were compared to see which best fit the data.  
107 Because there is a trend over time for weaning weight phenotypes and we do not have a random  
108 sample of DNA tested cows, calves born in the early 2000s may have low weaning weights  
109 compared to calves born in later years (**Figure 1d**) but ranked high in their own contemporary  
110 group (weaning weight ratio, **Figure 1e**). In other words, entire contemporary groups were not  
111 analyzed, only calves of genotyped dams. Thus, some contemporary groups only had a small  
112 number of calves represented and the data have inherent selection bias. Therefore, we also  
113 measured the association between the dam's GMX WW scores and GMX Milk scores with the  
114 calf's weaning weight ratio (no contemporary group effect was included in these models).

115

116 Estimates of GeneMax Advantage score effects were retrieved from Zoetis technical bulletin  
117 GMX-00116 (Zoetis Genetics and Angus Genetics Inc., 2018). Effects were converted from

118 Imperial to metric units, divided by 10 to represent a 1-point GeneMax score increase, and  
119 divided by 2 to change from molecular breeding values to expected progeny differences  
120 (transmitting abilities). Our GeneMax score effect estimates were compared to Zoetis' published  
121 estimates using a two-tailed Z-test.

122

## 123 **Results**

124 For each trait evaluated, the Pearson's correlation and Spearman's correlation between the calf's  
125 phenotype and the dam's corresponding GMX Score were statistically different from zero (**Table**  
126 **2**). Further, from the six regression models, the dam's GMX Score had a significant effect on the  
127 calf's phenotype (**Table 3**). Except for fat thickness, our estimated effect sizes were not  
128 statistically different compared with those published by Zoetis (**Table 3**). When weaning weight  
129 ratio was the dependent variable to more accurately account for an animal's rank in its  
130 contemporary group, WW GMX score was significantly predictive in the simple model with sex  
131 and random sire ( $0.08944 \pm 0.02057$ ,  $p\text{-value} = 1.8e-05$ ). When Milk GMX Score was compared  
132 to weaning weight ratio, the effect was not significant ( $p\text{-value} = 0.16$ ). A model containing both  
133 GMX WW Score and GMX Milk Score provided a better fit to the data and estimated larger  
134 effects for the GMX Scores compared with the models using one GMX Score (**Table 4**). Calf  
135 phenotypes were plotted against dam's GMX Score in **Figure 2**.

136 Tables 5 through 10 report additional model statistics. Models that included GeneMax score and  
137 sire fit the data better (lower AIC, lower BIC, higher pseudo- $R^2$ , better log likelihoods) than  
138 models that included maternal grandsire (MGS) and sire. Further, GeneMax scores were more  
139 significantly associated with progeny performance (smaller  $P$ -values) than the random effect of  
140 maternal grandsire.

141 **Discussion**

142 In the last ten years, the use of DNA information to produce genomic predictions has changed  
143 substantially. For example, when first launched in 2010, the IGENITY MBVs (molecular  
144 breeding values) were only based on 384 DNA markers (Weber et al., 2012). However, even the  
145 initial genomic predictions (which were use as indicator traits in a multi-step genomic-enhanced  
146 EPD analysis) trained with a couple thousand animals accurately predicted genetic merit (Weber  
147 et al., 2012). In the last ten years, hundreds of thousands of beef cattle have been genotyped from  
148 multiple breeds, increasing the power of these datasets not just for genetic prediction, but also for  
149 basic research (Decker, 2015). Since 2015, breed associations have switched to single-step  
150 methods, in which pedigree and genomic data are combined in a single analysis (Lourenco et al.,  
151 2015). Pedigree information is not typically known for commercial cattle, so a DNA marker  
152 effects model is typically used to predict genetic merit for commercial cattle. However, the  
153 estimated breeding values produced by a genomic relationship model and a marker effects model  
154 are equivalent (Hayes et al., 2009). The marker effects used to calculate GMX scores in the  
155 Zoetis GeneMax Advantage test are based on the American Angus Association single-step  
156 BLUP analysis (Zoetis Genetics and Angus Genetics Inc., 2018).

157  
158 All traits had relatively weak correlations between the calf's phenotype and the dam's GMX  
159 Score. However, this is to be expected as this analysis does not account for Mendelian sampling  
160 (random shuffle of genes between generations), contemporary group effects (management and  
161 environment effects), sire effects, or the heritability of the trait. Nevertheless, as all correlations  
162 were significantly different from zero, it does demonstrate the predictive ability of the GeneMax  
163 Advantage test.



164

165 Regression analysis allowed a more sophisticated evaluation of the relationship between a dam's  
166 GMX Score and her calf's phenotype. These models accounted for variation due to sex, year of  
167 birth or slaughter date, and sire effects. However, this model still did not account for Mendelian  
168 sampling or other non-additive genetic effects, including genotype-by-environment effects. The  
169 amount of variation due to Mendelian sampling is large and theoretically equal to half of the  
170 additive genetic variance. These sources of variation are likely why we still observe substantial  
171 spread around the regression lines in **Figure 2**. Genetic predictions are not designed to predict  
172 performance of individual animals, but rather the average performance of a large group of  
173 progeny out of a parent compared to the progeny average of a different parent or population  
174 average. Our results show that the GeneMax Advantage test accurately predicts the average  
175 progeny performance for weaning weight, milk, marbling, carcass weight, ribeye area and fat  
176 thickness. Further, GeneMax scores provided more information than simply knowing the sire of  
177 the dam.

178

179 Our estimates of the effects of GeneMax scores did not differ from those published by Zoetis  
180 with respect to Milk ( $P = 0.88$ ), Marb ( $P = 0.21$ ), CW ( $P = 0.19$ ), or RE ( $P = 0.58$ ). However, our  
181 estimate of the effect of GeneMax score did differ from that published by Zoetis with respect to  
182 Fat ( $P < 1.0e-22$ ) and tended to differ with respect to WW ( $P = 0.08$ ). However, for all traits, our  
183 estimated effect sizes were smaller than those reported by Zoetis. These smaller effect sizes  
184 could be for many reasons, including data from a single environment in northwest Missouri, the  
185 size of the dataset, or that this was an external validation.

186

187 Regardless of whether we expressed weaning growth as a weight or as a ratio within  
188 contemporary group, WW GMX Score significantly predicted variation in weaning growth.  
189 However, Milk GMX scores were not predictive of weaning weight ratio. This likely reflects the  
190 well-known difficulty of predicting maternal effects (Willham, 1980). For example, in the 2014  
191 Angus genomic-enhanced EPD calibration based on 57,550 animals, the correlation between  
192 weaning weight and Milk EPD was 0.36. The average of the other traits was 0.66 (range of 0.45  
193 to 0.78). In 2016, when 108,211 animals were used to estimate molecular breeding values, the  
194 correlation between weaning weight and Milk EPD was 0.37, range of 0.56 to 0.80 for other  
195 traits (Albers, 2016). Further, only 491 observations were available when analyzing weaning  
196 weight ratio, compared to 781 observations for the models that only fit contemporary group, sex,  
197 and sire. Thus, the difficulty of predicting maternal effects and the smaller sample sizes affected  
198 the more complicated Milk GMX models.

199  
200 We note that the Zoetis GeneMax Advantage prediction is designed to work in high-percentage  
201 Angus animals and is not designed for cattle with substantial ancestry from other breeds.  
202 However, other similar genomic predictions for crossbred cattle should be equally accurate  
203 provided they contain the appropriate breeds in a large, multi-breed training population  
204 (Kachman et al., 2013).

205  
206 Genetic predictions, whether based on pedigree or genomic relationships, work when trained  
207 using ample and appropriately structured data. Models using contemporary group effects and  
208 random effects to account for covariance between relatives appropriately separate additive  
209 genetic variation from other sources of variation, including management and environment. While

210 genetic predictions were never intended to predict the performance of a single individual, the  
211 average progeny performance is accurately predicted by the additive genetic merit of the parent.  
212 However, biological variation remains, including non-additive genetic effects and interactions  
213 (Smith et al., 2019; Braz et al., 2020) and especially Mendelian sampling (Cole and VanRaden,  
214 2011) between full- or half-siblings. The increased adoption of genomic technologies in  
215 commercial cattle production has the opportunity to significantly increase long-term genetic gain  
216 through more accurate replacement animal selection.

217

## 218 **Conclusions**

219 Genomic predictions, including the Zoetis GeneMax Advantage, accurately predict a  
220 straightbred, commercial Angus animal's genetic merit and the average performance of their  
221 offspring. Academics and extension professionals can confidently state to farmers and ranchers  
222 that genomic predictions in commercial animals are accurate and effective.

223

## 224 **Acknowledgements**

225 JED was supported by Agriculture and Food Research Initiative Competitive Grant numbers,  
226 USDA-NIFA 2016-68004-24827, USDA-NIFA 2018-68008-27891, 2020-67015-31132, and  
227 2021-67021-33448 from the USDA National Institute of Food and Agriculture and USDA-NIFA  
228 Hatch MO-HAAS0027, USDA-NIFA MO-MSAS0014 (National Animal Genome Research  
229 Program). DJP was supported by USDA-NRI 2000-35203-9175, USDA-NRI 2005-55203-  
230 15750, USDA-NIFA 2007-55618-18238, USDA-NIFA 2013-68004-20364, and USDA-NIFA  
231 2018-68008-27891. We acknowledge the support of the University of Missouri College of  
232 Agriculture, Food, and Natural Resources Thompson Research Center for providing labor, funds,

233 and time for the collection of samples and data. This manuscript is published in memory of  
234 Miroslav Kaps. Miroslav Kapš was awarded his Ph.D. under the direction of William Lamberson  
235 at the University of Missouri in 1997 based on analysis of field records of Angus cattle. He was  
236 lead author of *Biostatistics for Animal Science*, a widely used reference text that was published in  
237 multiple editions and languages.

238

### 239 **Author Statement**

240 **Brian. C. Arisman:** Formal analysis, Writing - Original Draft **Troy N. Rowan:** Formal analysis,  
241 Writing - Review & Editing, Visualization **Jordan M. Thomas:** Resources, Investigation **Harly**  
242 **J. Durbin:** Resources, Investigation, Supervision **William R. Lamberson:** Resources,  
243 Supervision **David J. Patterson:** Resources, Funding acquisition **Jared E. Decker:**  
244 Conceptualization, Methodology, Formal analysis, Writing - Review & Editing, Visualization,  
245 Supervision, Funding acquisition

### 246 **Disclosures**

247 Jared Decker is a member of the scientific advisory board of Vytelle, LLC.

248

### 249 **Literature Cited**

250 Albers, C. 2016. Angus Announces Routine Calibration of GE-EPDs. Angus Media. Available  
251 from: <http://www.angus.org/pub/newsroom/Releases/032116-recalibration.html>  
252 Bartoń K 2022. MuMIn: Multi-Model Inference. R package version 1.47.1, [https://CRAN.R-](https://CRAN.R-project.org/package=MuMIn)  
253 [project.org/package=MuMIn](https://CRAN.R-project.org/package=MuMIn)  
254 Braz, C. U., T. N. Rowan, R. D. Schnabel, and J. E. Decker. 2020. Extensive genome-wide  
255 association analyses identify genotype-by-environment interactions of growth traits in

256 Simmental cattle. bioRxiv. doi:10.1101/2020.01.09.900902. Available from:  
257 <https://doi.org/10.1101/2020.01.09.900902>

258 Cole, J. B., and P. M. VanRaden. 2011. Use of Haplotypes to Estimate Mendelian Sampling  
259 Effects and Selection Limits. *J. Anim. Breed. Genet.* 128:1–4. doi:10.1111/j.1439-  
260 0388.2011.00922.x. Available from: <http://www.ncbi.nlm.nih.gov/pubmed/22059578>

261 Decker, J. E. 2015. Agricultural Genomics: Commercial Applications Bring Increased Basic  
262 Research Power. G. Gibson, editor. *PLoS Genet.* 11:3. doi:10.1371/journal.pgen.1005621.  
263 Available from: <http://dx.plos.org/10.1371/journal.pgen.1005621>

264 Van Eenennaam, a L., J. Li, R. M. Thallman, R. L. Quaas, M. E. Dikeman, C. a Gill, D. E.  
265 Franke, and M. G. Thomas. 2007. Validation of commercial DNA tests for quantitative beef  
266 quality traits. *J. Anim. Sci.* 85:891–900. doi:10.2527/jas.2006-512. Available from:  
267 <http://www.ncbi.nlm.nih.gov/pubmed/17178813>

268 García-Ruiz, A., J. B. Cole, P. M. VanRaden, G. R. Wiggans, F. J. Ruiz-López, and C. P. Van  
269 Tassell. 2016. Changes in genetic selection differentials and generation intervals in US Holstein  
270 dairy cattle as a result of genomic selection. *Proc. Natl. Acad. Sci.*  
271 doi:10.1073/PNAS.1519061113.

272 Genetics, Z., and A. G. Inc. 2018. More Informed Commercial Angus Replacement Heifer  
273 Decisions with GeneMax® Advantage™. Available from: [https://www.zoetisus.com/animal-  
274 genetics/beef/pdf/zoetis-gmx-advantage-technical-bulletin-final.pdf](https://www.zoetisus.com/animal-genetics/beef/pdf/zoetis-gmx-advantage-technical-bulletin-final.pdf)

275 Hayes, B. J., P. M. Visscher, and M. E. Goddard. 2009. Increased accuracy of artificial selection  
276 by using the realized relationship matrix. *Genet. Res. (Camb).* doi:10.1017/S0016672308009981.

277 Kachman, S. D., M. L. Spanger, G. L. Bennett, K. J. Hanford, L. A. Kuehn, W. M. Snelling, R.  
278 M. Thallman, M. Saatchi, D. J. Garrick, R. D. Schnabel, J. F. Taylor, and E. J. Pollak. 2013.

279 Comparison of molecular breeding values based on within- and across-breed training in beef  
280 cattle. *Genet. Sel. Evol.* 45:30. doi:10.1186/1297-9686-45-30. Available from:  
281 <http://www.gsejournal.org/content/45/1/30>

282 Lourenco, D. A. L., S. Tsuruta, B. O. Fragomeni, Y. Masuda, I. Aguilar, A. Legarra, J. K.  
283 Bertrand, T. S. Amen, L. Wang, D. W. Moser, and I. Misztal. 2015. Genetic evaluation using  
284 single-step genomic best linear unbiased predictor in American Angus. *J. Anim. Sci.*  
285 doi:10.2527/jas.2014-8836.

286 Meuwissen, T. H. E., B. J. Hayes, and M. E. Goddard. 2001. Prediction of total genetic value  
287 using genome-wide dense marker maps. *Genetics*. 157:1819–1829. Available from:  
288 <http://www.pubmedcentral.nih.gov/articlerender.fcgi?artid=1461589&tool=pmcentrez&renderty>  
289 [pe=abstract](http://www.pubmedcentral.nih.gov/articlerender.fcgi?artid=1461589&tool=pmcentrez&renderty)

290 Nejati-Javaremi, A., C. Smith, and J. P. Gibson. 1997. Effect of Total Allelic Relationship on  
291 Accuracy of Evaluation and Response to Selection. *J. Anim. Sci.* 75:1738–1745.

292 Smith, J. L., M. L. Wilson, S. M. Nilson, T. N. Rowan, D. L. Oldeschulte, R. D. Schnabel, J. E.  
293 Decker, and C. M. Seabury. 2019. Genome-wide association and genotype by environment  
294 interactions for growth traits in U.S. Gelbvieh cattle. *BMC Genomics*. 20:926.  
295 doi:10.1186/s12864-019-6231-y. Available from:  
296 <https://bmcgenomics.biomedcentral.com/articles/10.1186/s12864-019-6231-y>

297 Taylor, J. F., K. H. Taylor, and J. E. Decker. 2016. Holsteins are the genomic selection poster  
298 cows. *Proc. Natl. Acad. Sci. U. S. A.* 113. doi:10.1073/pnas.1608144113.

299 Team, R. D. C. 2018. R: A Language and Environment for Statistical Computing. R. D. C.  
300 Team, editor. *R Found. Stat. Comput.* 1. Available from: <http://www.r-project.org>

301 Weaber, R. L., J. E. Beever, H. C. Freetly, D. J. Garrick, S. L. Hansen, K. A. Johnson, M. S.

302 Kerley, D. D. Loy, E. Marques, H. L. Neibergs, E. J. Pollak, R. D. Schnabel, C. M. Seabury, D.  
303 W. Shike, M. L. Spangler, and J. F. Taylor. 2014. Analysis of US Cow-Calf Producer Survey  
304 Data to Assess Knowledge, Awareness and Attitudes Related to Genetic Improvement of Feed  
305 Efficiency. In: 10th World Congress on Genetics Applied to Livestock Production. Vancouver,  
306 Canada.

307 Weber, K. L., D. J. Drake, J. F. Taylor, D. J. Garrick, L. A. Kuehn, R. M. Thallman, R. D.  
308 Schnabel, W. M. Snelling, E. J. Pollak, and a. L. Van Eenennaam. 2012. The accuracies of  
309 DNA-based estimates of genetic merit derived from Angus or multibreed beef cattle training  
310 populations. *J. Anim. Sci.* 90:4191–4202. doi:10.2527/jas.2011-5020.

311 Wickham, H. 2016. *ggplot2: Elegant Graphics for Data Analysis*. Springer-Verlag New York.  
312 Available from: <http://ggplot2.org>

313 Wickham, H. 2018. *stringr: Simple, Consistent Wrappers for Common String Operations*.  
314 Available from: <https://cran.r-project.org/package=stringr>

315 Wickham, H., R. François, L. Henry, and K. Müller. 2018a. *dplyr: A Grammar of Data*  
316 *Manipulation*. Available from: <https://cran.r-project.org/package=dplyr>

317 Wickham, H., and L. Henry. 2018. *tidyr: Easily Tidy Data with “spread()” and “gather()”*  
318 *Functions*. Available from: <https://cran.r-project.org/package=tidyr>

319 Wickham, H., J. Hester, and R. Francois. 2018b. *readr: Read Rectangular Text Data*. Available  
320 from: <https://cran.r-project.org/package=readr>

321 Willham, R. L. 1980. Problems in estimating maternal effects. *Livest. Prod. Sci.* 7:405–418.  
322 doi:10.1016/0301-6226(80)90080-9. Available from:  
323 <https://linkinghub.elsevier.com/retrieve/pii/0301622680900809>

324 Zoetis Genetics. (2016). Understanding and using GeneMax Advantage Results. Retrieved  
325 September 4, 2018, from [https://www.angus.org/AGI/UnderstandingGMXAdvantageResults-08-](https://www.angus.org/AGI/UnderstandingGMXAdvantageResults-08-26-16.pdf)  
326 [26-16.pdf](https://www.angus.org/AGI/UnderstandingGMXAdvantageResults-08-26-16.pdf)  
327



328 **Tables and Figures**

329 **Table 1.** Summary statistics of data used for GeneMax Advantage evaluation. For GeneMax

330 scores, we report the number of animals with test results (Number) and the number of cows with

331 calves with phenotypes (Number with matched calves).

|                                           | <b>Number<br/>(Number<br/>with<br/>matched<br/>calves)</b> | <b>Mean</b> | <b>Standard<br/>Deviation</b> | <b>Median</b> | <b>Minimum</b> | <b>Maximum</b> | <b>Skew</b> | <b>Kurtosis</b> |
|-------------------------------------------|------------------------------------------------------------|-------------|-------------------------------|---------------|----------------|----------------|-------------|-----------------|
| <b>Weaning<br/>Weight,<br/>kg</b>         | 781                                                        | 263.0       | 26.3                          | 264.4         | 178.3          | 347.5          | -0.17       | 3.05            |
| <b>Weaning<br/>Weight<br/>Ratio</b>       | 491                                                        | 100.1       | 9.0                           | 100           | 67             | 130            | -0.08       | 3.53            |
| <b>Marbling<br/>Score</b>                 | 374                                                        | 6.5         | 1.1                           | 6.6           | 3.2            | 9.2            | -0.22       | 3.1             |
| <b>Hot<br/>Carcass<br/>Weight,<br/>kg</b> | 376                                                        | 398.7       | 40.3                          | 401.9         | 249.5          | 504.9          | -0.62       | 3.93            |
| <b>Fat<br/>Thickness,<br/>cm</b>          | 290                                                        | 1.8         | 0.5                           | 1.7           | 0.5            | 4.1            | 1.1         | 6.33            |
| <b>Ribeye<br/>Area, cm<sup>2</sup></b>    | 374                                                        | 84.8        | 9.3                           | 84.5          | 57.4           | 112.9          | 0.12        | 2.87            |
| <b>WW<br/>GMX<br/>Score</b>               | 554 (231)                                                  | 45.6        | 20.4                          | 45.0          | 3              | 97             | 0.19        | 2.27            |
| <b>Milk<br/>GMX<br/>Score</b>             | 554 (231)                                                  | 51.6        | 21.2                          | 53.0          | 3              | 97             | -0.14       | 2.18            |
| <b>CW GMX<br/>Score</b>                   | 554 (196)                                                  | 49.2        | 19.4                          | 48            | 7              | 95             | 0.11        | 2.27            |
| <b>Marb<br/>GMX<br/>Score</b>             | 555 (196)                                                  | 64.3        | 21.2                          | 67            | 7              | 98             | -0.44       | 2.25            |

|                          |           |      |      |    |   |    |      |      |
|--------------------------|-----------|------|------|----|---|----|------|------|
| <b>RE GMX<br/>Score</b>  | 556 (196) | 50.5 | 20.1 | 49 | 7 | 97 | 0.19 | 2.06 |
| <b>Fat GMX<br/>Score</b> | 557 (188) | 43.3 | 19.9 | 42 | 3 | 93 | 0.26 | 2.18 |

---

332

333

334 **Table 2.** Pearson and Spearman correlation tests between the dam's Zoetis GeneMax Advantage  
335 Score (Kalamazoo, MI) and the calf's phenotype (not adjusted for contemporary group or sire  
336 effects).

| <b>GeneMax Trait</b> | <b>Pearson<br/>Correlation<br/>(95% Confidence<br/>Interval)</b> | <b>Pearson<br/>Correlation<br/>P-value</b> | <b>Spearman<br/>Correlation</b> | <b>Spearman<br/>Correlation<br/>P-value</b> |
|----------------------|------------------------------------------------------------------|--------------------------------------------|---------------------------------|---------------------------------------------|
| Weaning Weight       | 0.18<br>(0.11 to 0.25)                                           | 5.4e-07                                    | 0.18                            | 3.0e-07                                     |
| Maternal Milk        | 0.18<br>(0.11 to 0.25)                                           | 2.5e-07                                    | 0.16                            | 5.3e-06                                     |
| Marbling             | 0.27<br>(0.18 to 0.36)                                           | 8.4e-08                                    | 0.25                            | 1.3e-06                                     |
| Carcass Weight       | 0.13<br>(0.02 to 0.22)                                           | 1.5e-02                                    | 0.15                            | 4.8e-03                                     |
| Fat Thickness        | -0.18<br>(-0.29 to -0.07)                                        | 1.9e-03                                    | -0.19                           | 1.1e-03                                     |
| Ribeye Area          | 0.12<br>(0.02 to 0.22)                                           | 2.0e-02                                    | 0.11                            | 3.0e-02                                     |

337

338 **Table 3.** Estimated effects of GMX Scores on production traits. Each row represents a different  
 339 linear mixed model. Models contained contemporary group and sex as fixed effects and sire as a  
 340 random effect. Difference from zero *P*-values and MGS *P*-values are from  $\chi^2$  test comparing full  
 341 and reduced model. Difference from Zoetis effects estimated from a Z-test.

| GMX Score | Estimate             | Std. Error           | GMX effect difference from zero <i>P</i> -value | Zoetis effect        | Difference from Zoetis <i>P</i> -value | MGS effect <i>P</i> -value |
|-----------|----------------------|----------------------|-------------------------------------------------|----------------------|----------------------------------------|----------------------------|
| WW        | 0.18 kg              | 0.04 kg              | 1.1e-05                                         | 0.25 kg              | 0.08                                   | 1.1e-03                    |
| Milk      | 0.13 kg              | 0.04 kg              | 3.2e-04                                         | 0.14 kg              | 0.88                                   | 1.1e-03                    |
| Marb      | 0.01                 | 0.002                | 1.1e-06                                         | 0.01                 | 0.21                                   | 3.2e-03                    |
| CW        | 0.20 kg              | 0.09 kg              | 3.3e-02                                         | 0.32 kg              | 0.19                                   | 1.0*                       |
| RE        | 0.06 cm <sup>2</sup> | 0.02 cm <sup>2</sup> | 2.2e-03                                         | 0.07 cm <sup>2</sup> | 0.58                                   | 9.5e-03                    |
| Fat       | -0.003 cm            | 0.001 cm             | 2.0e-02                                         | -0.03 cm             | <1.0e-22                               | 1.0*                       |

342 \*The estimated maternal grandsire variance for these models was zero.

343 **Table 4.** Estimated effects of dam's WW and Milk GMX Scores on calf's weaning weight. *P*-  
344 values from  $\chi^2$  test comparing full model with both traits versus reduced models with single trait.

| <b>GMX Score</b> | <b>Estimate</b> | <b>Std. Error</b> | <b><i>P</i>-value</b> |
|------------------|-----------------|-------------------|-----------------------|
| WW               | 0.20 kg         | 0.04 kg           | 1.0e-06               |
| Milk             | 0.15 kg         | 0.04 kg           | 3.0e-05               |

345

346

347

348 **Table 5.** Summary of weaning weight models.

| Model                                                           | AIC    | BIC    | Sire Variance | MGS <sup>a</sup> Variance | Residual Variance | Pseudo-R <sup>2</sup> |
|-----------------------------------------------------------------|--------|--------|---------------|---------------------------|-------------------|-----------------------|
| Linear Model with WW GeneMax score                              | 7075.1 | 7154.3 |               |                           | 491.9             | 0.3023                |
| Linear Model with Milk GeneMax score                            | 7080.4 | 7159.7 |               |                           | 495.3             | 0.2975                |
| Mixed Model with WW GeneMax score and sire                      | 7014.0 | 7097.9 | 94.02         |                           | 412.73            | 0.3564                |
| Mixed Model with Milk GeneMax score and sire                    | 7020.4 | 7104.3 | 95.12         |                           | 416.08            | 0.3511                |
| Mixed Model with WW GeneMax score, Milk GeneMax score, and sire | 6998.6 | 7087.1 | 90.71         |                           | 403.84            | 0.3706                |
| Mixed model with sire                                           | 7031.4 | 7110.6 | 98.09         |                           | 422.81            | 0.3402                |
| Mixed model with MGS and sire                                   | 7022.8 | 7106.7 | 99.52         | 41.77                     | 401.89            | 0.3491                |

349 <sup>a</sup> MGS stands for Maternal Grand Sire.

350 **Table 6.** Summary of weaning weight ratio models.

| Model                                        | AIC    | BIC    | Sire Variance | MGS <sup>a</sup> Variance | Residual Variance | Pseudo-R <sup>2</sup> |
|----------------------------------------------|--------|--------|---------------|---------------------------|-------------------|-----------------------|
| Linear Model with WW GeneMax score           | 3512.9 | 3533.8 |               |                           | 74.03             | 0.0997                |
| Linear Model with Milk GeneMax score         | 3525.2 | 3546.2 |               |                           | 75.92             | 0.0767                |
| Mixed Model with WW GeneMax score and sire   | 3496.9 | 3522.1 | 8.97          |                           | 66.37             | 0.1321                |
| Mixed Model with Milk GeneMax score and sire | 3513.4 | 3538.5 | 7.365         |                           | 69.267            | 0.1025                |
| Mixed model with sire                        | 3513.3 | 3534.3 | 8.00          |                           | 69.33             | 0.0989                |
| Mixed model with MGS and sire                | 3509.4 | 3534.6 | 8.275         | 8.337                     | 65.109            | 0.1097                |

351 <sup>a</sup> MGS stands for Maternal Grand Sire.

352

353 **Table 7.** Summary of marbling models.

| Model                                   | AIC    | BIC    | Sire Variance | MGS <sup>a</sup> Variance | Residual Variance | Pseudo-R <sup>2</sup> |
|-----------------------------------------|--------|--------|---------------|---------------------------|-------------------|-----------------------|
| Linear Model with GeneMax score         | 1032.2 | 1181.3 |               |                           | 0.8377            | 0.4404                |
| Mixed Model with GeneMax score and sire | 1002.9 | 1155.9 | 0.1050        |                           | 0.6411            | 0.4892                |
| Mixed model with sire                   | 1024.7 | 1173.8 | 0.0955        |                           | 0.6887            | 0.4525                |
| Mixed model with MGS and sire           | 1018.0 | 1171.1 | 0.09282       | 0.07898                   | 0.63735           | 0.4661                |

354 <sup>a</sup> MGS stands for Maternal Grand Sire.

355

356

357 **Table 8.** Summary of carcass weight models.

| Model                                   | AIC    | BIC    | Sire Variance | MGS <sup>a</sup> Variance | Residual Variance | Pseudo-R <sup>2</sup> |
|-----------------------------------------|--------|--------|---------------|---------------------------|-------------------|-----------------------|
| Linear Model with GeneMax score         | 3724.2 | 3873.5 |               |                           | 1062.5            | 0.4089                |
| Mixed Model with GeneMax score and sire | 3713.3 | 3866.6 | 161.9         |                           | 848.3             | 0.4288                |
| Mixed model with sire                   | 3715.8 | 3865.2 | 152.1         |                           | 862.0             | 0.4220                |
| Mixed model with MGS and sire           | 3717.8 | 3871.1 | 152.1         | 0.0                       | 862.0             | 0.4220                |

358 <sup>a</sup> MGS stands for Maternal Grand Sire.

359

360 **Table 9.** Summary of ribeye area models.

| Model                                   | AIC    | BIC    | Sire Variance | MGS <sup>a</sup> Variance | Residual Variance | Pseudo-R <sup>2</sup> |
|-----------------------------------------|--------|--------|---------------|---------------------------|-------------------|-----------------------|
| Linear Model with GeneMax score         | 2598.3 | 2747.4 |               |                           | 55.17             | 0.4256                |
| Mixed Model with GeneMax score and sire | 2586.8 | 2739.9 | 7.105         |                           | 44.329            | 0.4460                |
| Mixed model with sire                   | 2594.2 | 2743.4 | 6.418         |                           | 45.747            | 0.4318                |
| Mixed model with MGS and sire           | 2589.5 | 2742.6 | 7.952         | 5.821                     | 41.880            | 0.4420                |

361 <sup>a</sup> MGS stands for Maternal Grand Sire.

362

363 **Table 10.** Summary of fat thickness models.

| Model                                   | AIC    | BIC    | Sire Variance | MGS <sup>a</sup> Variance | Residual Variance | Pseudo-R <sup>2</sup> |
|-----------------------------------------|--------|--------|---------------|---------------------------|-------------------|-----------------------|
| Linear Model with GeneMax score         | 369.65 | 432.04 |               |                           | 0.1972            | 0.2527                |
| Mixed Model with GeneMax score and sire | 371.0  | 437.1  | 0.006747      |                           | 0.1808            | 0.2552                |
| Mixed model with sire                   | 374.4  | 436.8  | 0.007184      |                           | 0.1840            | 0.2347                |
| Mixed model with MGS and sire           | 376.4  | 442.5  | 0.007184      | 0.00                      | 0.1840            | 0.2347                |

364 <sup>a</sup> MGS stands for Maternal Grand Sire.

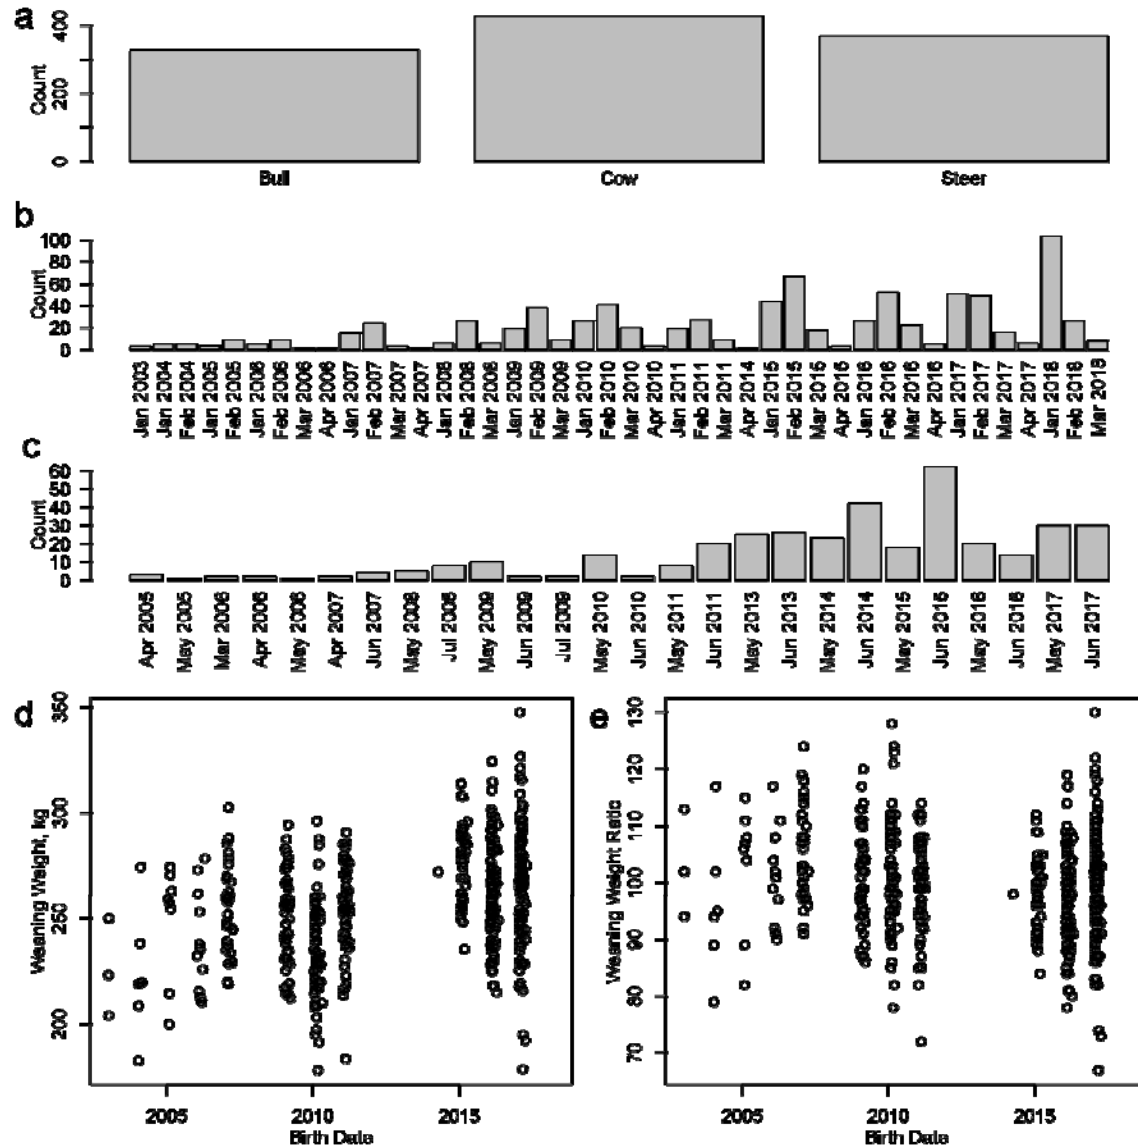

365  
 366 **Figure 1.** Graphical summary of data available for analysis. a) Counts of animals by sex. An  
 367 animal can be counted as both a bull and a steer, for example if it was a bull at weaning but  
 368 castrated prior to entering the feedlot. b) Counts of animals by birth month and year. c) Counts of  
 369 animals by slaughter month and year. d) Weaning weight plotted against birth date. e) Weaning  
 370 weight ratio plotted against birth date.



371

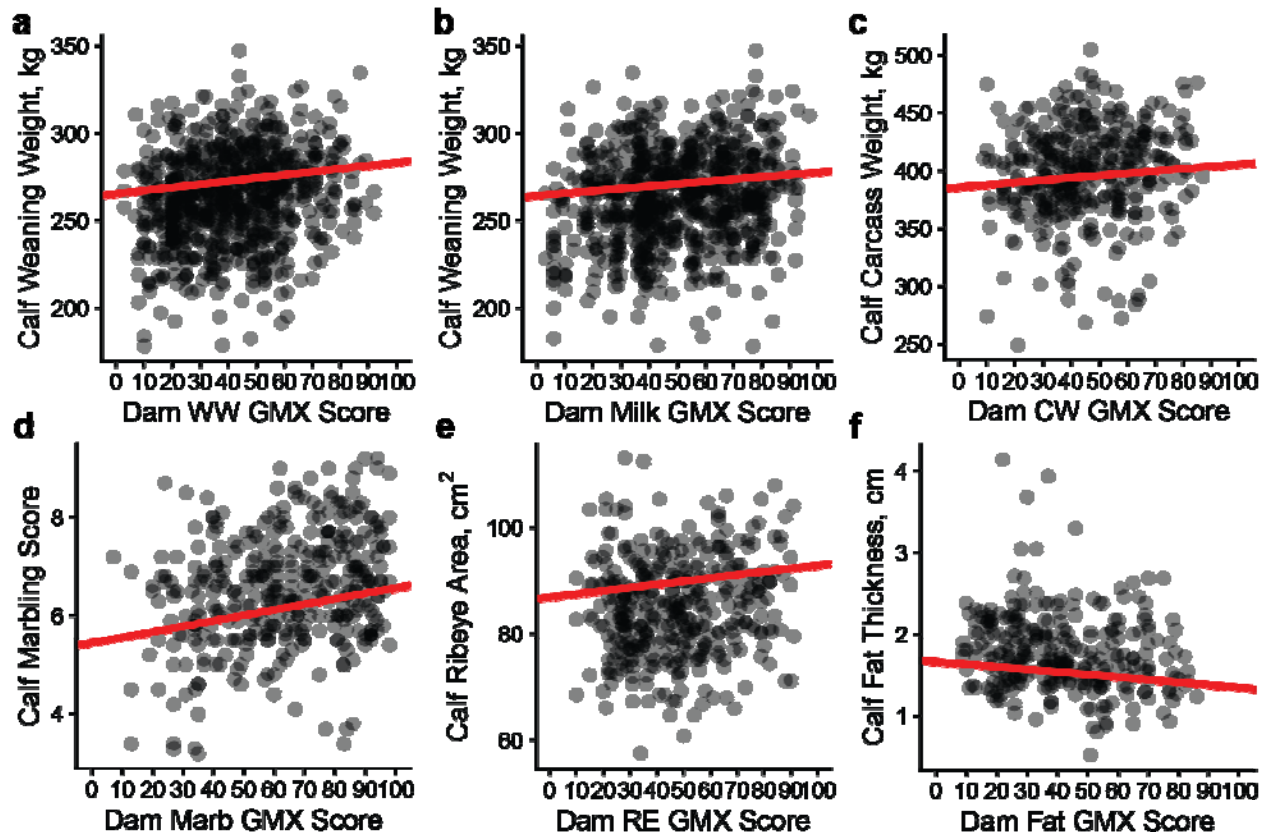

372

373 **Figure 2.** Calf's phenotype plotted against dam's GMX Score. a) Weaning weight versus WW  
374 GMX Score, b) Weaning weight versus Milk GMX Score, c) Carcass weight versus CW GMX  
375 Score, d) Marbling score versus Marb GMX Score, e) Ribeye area versus RE GMX Score, and f)  
376 Fat Thickness versus Fat GMX Score. Red line represents the intercept and slope estimated from  
377 the linear models reported in Table 3.

378
